# Supplementary material for: Impact of preprocedural mitral regurgitation upon mortality after transcatheter aortic valve implantation (TAVI) for severe aortic stenosis
Source: PubMed Central journal article supplement — Heart. 2014 Aug 25;100(22):1799–803. doi: 10.1136/heartjnl-2014-305775 (PMC4215343; doi:10.1136/heartjnl-2014-305775), 2014-08-25
Supplement: heartjnl-2014-305775-s1.pdf [file heartjnl-2014-305775-s1.pdf]

|                                      | MR worse<br>n=69 | MR better<br>n=89 | P value    |       |
|--------------------------------------|------------------|-------------------|------------|-------|
| Age (years, mean±SD)                 | 81.6±10.1        | 82.7±7.6          | 0.453      |       |
| Male % (n)                           | 56.5% (39)       | 56.2% (50)        | 0.966      |       |
| Peripheral vascular disease          | 13.0% (9)        | 7.9% (7)          | 0.285      |       |
| Chronic respiratory disease          | 13.0% (9)        | 25.8% (23)        | 0.047      |       |
| Atrial fibrillation                  | 14.7% (10)       | 10.1% (9)         | 0.382      |       |
| Pulmonary hypertension               | 13 (19.1%)       | 18.0% (16)        | 0.461      |       |
| Prior revascularisation              | 37.7% (26)       | 36.0% (32)        | 0.823      |       |
| Logistic EuroScore (%)               | 20.0±13.4        | 22.8±10.9         | 0.139      |       |
| STS                                  | 5.5±2.7          | 5.8±3.0           | 0.490      |       |
| LV ejection fraction (%)             | 50.3±12.8        | 47.3±13.5         | 0.156      |       |
| LV end diastolic diameter (cm)       | 4.6±0.9          | 4.7±0.8           | 0.491      |       |
| Peak AV gradient (mmHg)              | 71.9±24.3        | 72.2±24.6         | 0.935      |       |
| Aortic Valve area (cm <sup>2</sup> ) | 0.68±0.24        | 0.69±0.30         | 0.749      |       |
| Aortic regurgitation ≥grade 3        | 13.0% (9)        | 20.2% (18)        | 0.234      |       |
| RV systolic pressure (mmHg)          | 38.5±13.9        | 35.7±14.0         | 0.411      |       |
| Tricuspid regurgitation ≥grade 3     | 10.1% (7)        | 13.5% (12)        | 0.522      |       |
| eGFR (ml/kg/1.73m <sup>2</sup> )     | 57.5±19.4        | 60.5±21.7         | 0.363      |       |
| Site                                 | Transapical      | 27.5% (19)        | 33.7% (30) | 0.262 |
|                                      | Transfemoral     | 46.4% (32)        | 45 (50.6%) |       |
|                                      | Transaortic      | 26.1% (18)        | 15.7% (14) |       |
